# Supplementary material for: Transcriptome-wide based identification of miRs in congenital anomalies of the kidney and urinary tract (CAKUT) in children: the significant upregulation of tissue miR-144 expression
Source: Springer Nature journal article supplement (doi:10.1186/s12967-016-0955-0), 2016-06-30
Supplement: MOESM2 [file 10307020]

**Supplementary table 1. Top ranked miRs in Co-inertia analysis (CIA) performed with five different miR target prediction algorithms.**

| miRanda        | TargetScan     | TargetScanS    | Pictar4way      | Pictar5way      | miRs associated with CAKUT |
|----------------|----------------|----------------|-----------------|-----------------|----------------------------|
| miR-194        | <b>miR-191</b> | <b>miR-139</b> | miR-369-5p      | <b>miR-200a</b> |                            |
| <b>miR-144</b> | miR-423        | <b>miR-375</b> | <b>miR-191</b>  | <b>miR-222</b>  |                            |
| miR-577        | <b>miR-210</b> | <b>miR-101</b> | <b>miR-200a</b> | miR-302c-star   | <b>miR-144</b>             |
| miR-802        | miR-134        | <b>miR-183</b> | miR-149         | miR-205         | <b>miR-152</b>             |
| miR-616        | <b>miR-375</b> | <b>miR-144</b> | <b>miR-215</b>  | miR-143         | <b>miR-210</b>             |
| miR-376a       | miR-30-3p      | <b>miR-1</b>   | <b>miR-375</b>  | <b>miR-210</b>  | <b>miR-375</b>             |
| miR-302c       | miR-409-3p     | <b>miR-206</b> | <b>miR-148a</b> | miR-221         | <b>miR-1</b>               |
| miR-585        | miR-431        | miR-145        | miR-16          | <b>miR-148b</b> | <b>miR-101</b>             |
| <b>miR-338</b> | miR-224        | miR-106        | <b>miR-148b</b> | miR-21          | <b>miR-139</b>             |
| miR-493-5p     | <b>miR-139</b> | miR-17         | <b>miR-210</b>  | <b>miR-148a</b> | <b>miR-148</b>             |
| miR-30c        | <b>miR-495</b> | miR-20         | <b>miR-222</b>  | <b>miR-206</b>  | <b>miR-148a</b>            |
| miR-379        | miR-299-5p     | miR-181        | miR-23b         | <b>miR-338</b>  | <b>miR-148b</b>            |
| <b>miR-495</b> | <b>miR-148</b> | miR-23         | miR-23a         | miR-199a-star   | <b>miR-183</b>             |
| miR-569        | <b>miR-152</b> | <b>miR-148</b> | miR-340         | <b>miR-144</b>  | <b>miR-191</b>             |
| miR-607        | miR-100        | <b>miR-152</b> | miR-15b         | <b>miR-1</b>    | <b>miR-200a</b>            |
| miR-520h       | miR-99         | miR-199        | miR-136         | miR-155         | <b>miR-206</b>             |
| miR-520d       | miR-433-5p     | miR-141        | miR-195         | <b>miR-152</b>  | <b>miR-215</b>             |
| miR-658        | <b>miR-183</b> | miR-192        | <b>miR-101</b>  | miR-19b         | <b>miR-222</b>             |
| miR-200b       | miR-485-5p     | <b>miR-215</b> | miR-15a         | miR-19a         | <b>miR-338</b>             |
| miR-450        | miR-486        | miR-10         | miR-181b        | miR-142-5p      | <b>miR-495</b>             |

miRs associated with CAKUT appeared in at least two prediction algorithms are highlighted in bold
